1 Title page

2

3

4 The Gene Knockout of Angiotensin II Type 1a Receptor Improves High-fat Diet-  
5 Induced Obesity in rat *via* Promoting Adipose Lipolysis

6

7 AT1aR knockout improves obesity

8

9 Aiyun Li <sup>+</sup>, Wenjuan Shi <sup>+</sup>, Jin Wang, Xuejiao Wang, Yan Zhang, Zhandong Lei, Xiang-Ying Jiao <sup>\*</sup>

10

11

12

13 Key Laboratory of Cellular Physiology (Shanxi Medical University), Ministry of Education, and the

14 Department of Physiology, Shanxi Medical University, Taiyuan 030001, China

15

16

17 <sup>\*</sup> Correspondence author. Tel/Fax: +86-351-3985178;

18 E-mail address: [jiaoxy@sxmu.edu.cn](mailto:jiaoxy@sxmu.edu.cn); ORCID: 0000 0003 1182 9052

19

20

21 <sup>+</sup> These authors contributed equally to this work.

22

23 **Abstract**

24 *Aims:* The renin-angiotensin system (RAS) is over-activated and the serum angiotensin II (Ang II)  
25 level increased in obese patients, while their correlations were incompletely understood. This study  
26 aims to explore the role of Ang II in diet-induced obesity by focusing on adipose lipolysis.

27 *Methods:* Rat model of AT1aR gene knockout were established to investigate the special role of Ang  
28 II. Wild-type (WT) and AT1aR gene knockout (AT1aR<sup>-/-</sup>) SD rats were fed with normal diet or high-fat  
29 diet for 12 weeks. Adipose morphology and adipose lipolysis were examined.

30 *Results:* AT1aR deficiency activated lipolysis-related enzymes and increased the levels of NEFAs and  
31 glycerol released from adipose tissue in high-fat diet rats, while did not affect triglycerides synthesis.  
32 Besides, AT1aR knockout promoted energy expenditure and fatty acids oxidation in adipose tissue.  
33 cAMP levels and PKA phosphorylation in the adipose tissue were significantly increased in AT1aR<sup>-/-</sup>  
34 rats fed with high-fat. Activated PKA could promote adipose lipolysis and thus improved adipose  
35 histomorphology and insulin sensitivity in high-fat diet rats.

36 *Conclusions:* AT1aR deficiency alleviated adipocyte hypertrophy in high-fat diet rats by promoting  
37 adipose lipolysis via cAMP/PKA pathway, and thereby delayed the onset of obesity and related  
38 metabolic diseases.

39 *Key Words:* Angiotensin II type 1a receptor, obesity, adipose lipolysis, cAMP/PKA

40

41 **1. Introduction**

42 Obesity is a growing health problem that induces major metabolic disorders, such as diabetes,  
43 cardiovascular disease, and hypertension. Obesity has been officially listed as a disease by the World  
44 Health Organization in 2000. It has been predicted that more than 57.8% adults and about 3.3 billion

45 people worldwide will facing overweight or obesity problems by 2030[1]. With an increasing  
46 prevalence of obesity, it is urgent to elucidate the pathophysiological mechanism for obesity and  
47 develop effective therapy strategies for treatment of obesity and its associated disorders.

48 Adipose tissue plays major role in the development of obesity. Excess energy is stored in the  
49 adipose tissue in the form of triacylglycerol (TAG), while fatty acid mobilization via lipolysis releases  
50 fatty acids to increase hepatic fatty acid oxidation for energy supply[2]. Physiologically, adipose tissue  
51 maintains a dynamic balance between lipid synthesis and decomposition. However, adipose tissue  
52 stores excess energy by expansion and remodeling when the storage capacity of adipocytes is exceeded  
53 in response to overfeeding, resulting in fat accumulation and adipocyte hypertrophy[3, 4]. Therefore,  
54 inhibiting adipocyte hypertrophy can be an effective strategy for obesity treatment.

55 The renin-angiotensin system (RAS) is a dynamic physiologic system and its classic function is to  
56 regulate blood pressure and fluid and electrolyte balance. Angiotensin-converting enzyme inhibitor  
57 (ACEI) and angiotensin II receptor blockers (ARB) has been clinically used as antihypertensive drugs  
58 and play a crucial role in the treatment of cardiovascular diseases such as hypertension and heart  
59 failure. However, it has been found that these drugs have a positive effect in metabolic diseases such as  
60 obesity, insulin resistance and diabetes<sup>[5, 6]</sup>, indicating the relations between RAS and metabolic  
61 diseases. Animal studies have shown that mice with renin gene knockout are resistant to diet-induced  
62 obesity[7]. Besides, excessive activation of RAS is a common feature in obese patients[8, 9], and the  
63 serum levels of angiotensinogen (AGT) and angiotensin II (Ang II) in the obese are higher than those  
64 in normal population<sup>[10-12]</sup>. Adipose tissue is the most abundant source of AGT outside liver. It is  
65 showed that AGT expression increased in the adipose tissue of obese animal models and adipocyte-  
66 specific enhancement of AGT lead to insulin resistance[13], indicating the special role of adipose tissue

67 RAS in regulation of metabolic homeostasis. Adipose RAS has attracted more and more attention due  
68 to its close relationship with obesity and adipose dysfunction over the years[14-16]. However, the  
69 underline mechanism by which RAS activation in adipose tissue results in obesity and other metabolic  
70 diseases remain unclear.

71 Angiotensin II (Ang II), the predominant peptide of the RAS, exerts effects mainly by binding  
72 with angiotensin type 1 receptor (AT1R) in adipose tissue[14]. Hence, we established an obese rat  
73 model with AT1aR gene knockout to explore the role of adipose RAS in the develop process of  
74 obesity. The results showed that the gene knockout of AT1aR ameliorated adipocyte hypertrophy by  
75 promoting adipose lipolysis, and thereby improving obesity and related metabolic disorders. Our  
76 finding suggests that targeting RAS signaling in adipose tissue may become a promising therapy  
77 avenue for obesity and associated metabolic abnormalities.

## 78 **2. Materials and Methods**

### 79 **2.1 Experimental animals**

80 Wild type male Sprague-Dawley (SD) rats purchased from the Experimental Animal Center of  
81 Shanxi Medical University and AT1aR<sup>-/-</sup> male SD rats (Nanjing University-Nanjing Institute of  
82 Biology) were all fed in the SPF laboratory animal environmental facilities with 12 h light/dark cycles  
83 under standard room temperature (22 ± 2°C) and free access to water and food. AT1aR gene knockout  
84 rats have been verified as homozygous by polymerase chain reaction (PCR) (S1 Fig). All animal  
85 experiments were in accordance with the guidelines for the management of animals for medical  
86 experiments issued by the Ministry of Health of the People's Republic of China (No. 55) and animal  
87 ethics standards of Shanxi Medical University, and approved by the ethics committee.

88 4-week male wild type (WT) rats and AT1aR<sup>-/-</sup> rats were randomly divided into normal diet group

89 (ND) and high-fat-diet group (HFD). The HFD group rats were fed with 60% high-fat feed (D12492,  
90 Whitby Technology Co., Ltd. Beijing, China) and the ND group rats were fed with normal feed for 12  
91 weeks. Body weight was recorded weekly. At the end of feeding, rats were fasted overnight and  
92 anesthesia, blood sample was collected from the abdominal aorta for the assay of blood glucose,  
93 nonesterified free fatty acids (NEFAs), triglyceride (TG), total cholesterol (T-CHO), low-density  
94 lipoprotein (LDL) and high-density lipoprotein (HDL) contents with commercial kits (Jiancheng  
95 Bioengineering Institute, Nanjing, China). Serum glycerol content was measured with glycerol (liquid  
96 sample) enzymatic determination kit (Applygen Gene Technology Co., Ltd, Beijing). Epididymal  
97 adipose tissue were isolated immediately or stored at minus 80 degrees Celsius until analysis.  
98 Epididymal fat index were calculated as the ratio of epididymal fat weight to the body weight.

## 99 **2.2 Glucose tolerance test and insulin tolerance test**

100 For glucose tolerance test, rats were fasted overnight and administrated with glucose (2 g/kg) by  
101 gavage. For insulin tolerance test, rats were fasted for 6h and intraperitoneally injected insulin (1  
102 IU/kg). Blood glucose contents at 0 min, 15 min, 30 min, 60 min, 90 min, and 120 min were recorded  
103 and blood glucose area under curve (AUC) was calculated.

## 104 **2.3 Blood pressure measurement**

105 At the end of 12-week feeding, rats were anesthetized and blood pressure were measured by  
106 carotid artery cannulation and monitored with the BL-420 system.

## 107 **2.4 Morphological examination of adipose tissue**

108 Isolated epididymal adipose tissue was fixed with 4% paraformaldehyde, dehydrated with gradient  
109 alcohol and then embedded in paraffin. Embedded wax block was sliced and epididymal sections were  
110 stained with hematoxylin for 20 min and with eosin for 15 min, respectively. After sealing slide with

111 neutral gum, the morphology changes of adipocytes were visualized using optical microscope  
112 (Olympus, Japan) and the cross-sectional area of adipocytes were calculated with Image J software.

### 113 **2.5 Quantitative real time RT-PCR**

114 Total mRNA of epididymal adipose tissue was extracted with Trizol (Takara Bio Inc., Japan). The  
115 concentration and purity of extracted total mRNA were measured using NANODROP ONE (Thermo  
116 Scientific, USA). cDNA was synthesized with the PrimeScript<sup>TM</sup>RT reagent kit (Takara Bio Inc.,  
117 Japan) following the manufacturers' instructions. Relative quantitative PCR was conducted with a TB  
118 Green Primer Ex Taq II (Takara Bio Inc., Japan) using LightCycler® 96 Real-Time PCR System  
119 (Roche, USA). The primer sequences were obtained from Takara and listed in supplementary Table 1.  
120 Gene expressions were normalized with  $\beta$ -actin. Statistically relative quantification was analyzed with  
121 equation  $2^{-\Delta\Delta CT}$ . Ct is the threshold cycle to detect fluorescence.

#### 122 **Table 1**

123 Primer sequences used for quantitative real time RT-PCR

| Name           | Forward Primer (5'-3')   | Reverse Primer (5'-3')   |
|----------------|--------------------------|--------------------------|
| FAS            | ACCTCATCACTAGAAGCCACCAG  | GTGGTACTTGGCCTTGGGTTTA   |
| ACC            | TACAACGCAGGCATCAGAAG     | TGTGCTGCAGGAAGATTGAC     |
| CPT1a          | CTGCCAGTTCATTAAGCCACA    | CAGCTATGCAGCCTTTGACTACCA |
| PPAR $\alpha$  | GGCAATGCACTGAACATCGAG    | GCCGAATAGTTCGCCGAAAG     |
| PPAR $\delta$  | TGGCCCTGTTCCTAGAATTGATG  | GCAAACCTCTGCCTGTGAGCTG   |
| Dio2           | CTGTGGTTGGATGTAGTCACACGA | CTTGCACCAGGACCCAAATG     |
| $\beta$ -actin | ACGGTCAGGTCATCACTATCG    | GGCATAGAGGTCTTTACGGATG   |

### 124 **2.6 Measurement of free fatty acids and glycerol in adipose tissue**

125 At the end of 12-week feeding, rats were anesthetized and sterilized with alcohol. Epididymal  
126 adipose tissue was isolated and 200 mg adipose tissue was weight and cut into pieces, and then

127 incubated in serum-free DMEM for 24 hours. DMEM was collected to measure NEFAs and glycerol  
128 contents in the supernatant with commercial Kits following the manufacturer's instructions.

### 129 **2.7 Measurement of cAMP concentration**

130 Epididymal adipose tissue supernatants were obtained by homogenate and centrifugation. Cyclic  
131 AMP in the supernatants were measured using cAMP assay kit (4339, Cell Signaling Technology)  
132 according to the manufacturer's protocol.

### 133 **2.8 Western blot analysis**

134 Epididymal adipose tissue was homogenized with a tissue grinder at 4°C temperature and the  
135 lysate were centrifugation at 12000 rpm for 20 minutes. The protein concentrations were measured  
136 with BCA kit (KeyGEN BioTECH Corp., Ltd, Nanjin, China). The protein samples were denatured,  
137 separated by SDS-PAGE and then transferred to the PVDF membrane. Membranes were blocked with  
138 5% skim milk or bovine serum albumin (BSA) for 3 hours, and then incubated overnight at 4°C with  
139 specific primary antibodies as follows: ATGL (2138S, Cell Signaling Technology), P-HSL<sup>(ser660)</sup>  
140 (4126S, Cell Signaling Technology), HSL (4107S, Cell Signaling Technology), P-GSK-3 $\beta$ <sup>(ser9)</sup> (5558S,  
141 Cell Signaling Technology), GSK-3 $\beta$  (9315S, Cell Signaling Technology),  $\beta$ -actin (AP0060, Bioworld)  
142 and PKA (5842S, Cell Signaling Technology). Membranes were washed and incubated with secondary  
143 antibodies (BA1054, BOSTER Biological Technology) at room temperature for 3 hours. After  
144 washing, membranes were exposed by Super ECL Prime (SEVEN BIOTECH) with ChemiDoc™  
145 Imaging System (BIO-RAD, USA). The images were analyzed quantitatively by densitometry with  
146 Image J software.

### 147 **2.9. Statistical analysis**

148 Results were shown as mean  $\pm$  SEM. Data were analyzed by using Student's t test for comparison

149 the difference of two groups and the comparison among multiple groups was analyzed by one-way  
150 ANOVA. GraphPad Prism 6 was used for statistical analysis. A value of  $p < 0.05$  was considered  
151 statistically significant.

### 152 **3. Results**

#### 153 **3.1 AT1aR knockout improved insulin sensitivity and metabolic disorders in high-fat diet rats**

154 Glucose tolerance test and insulin tolerance test are important indicators that generally to be used  
155 to measure glucose tolerance and insulin sensitivity, respectively[17]. In response to glucose load or  
156 insulin injection, there was no significant differences between AT1aR<sup>-/-</sup> rats and WT rats with normal  
157 diet, while the area under the curve (AUC) in HFD-fed AT1aR<sup>-/-</sup> rats was significantly lower than that  
158 in the HFD-fed WT rats (Fig 1A, B), indicating that AT1aR knockout improved insulin sensitivity in  
159 high-fat-diet rats. Consistent with this, AT1aR knockout reduced the fasting blood glucose compared  
160 with WT rats fed with high-fat-diet (Fig 1C). Moreover, rats blood pressure was monitored through  
161 carotid artery intubation and the result showed that AT1aR gene knockout could reduce hypertension  
162 caused by high-fat feeding (Fig 1D).

163 Next, lipid metabolism-related indicators in serum were detected with commercial kits. The  
164 results showed that serum levels of TG, T-CHO, NEFAs, glycerol, LDL and HDL in high-fat diet WT  
165 rats were significantly higher than those of WT rats fed with normal diet, whereas these alterations  
166 were significantly reversed by AT1aR gene knockout, demonstrating that AT1aR knockout improved  
167 metabolic disorders in obese rats (Fig 1E-J). Besides, serum LDL level of AT1aR<sup>-/-</sup> rats were also  
168 lower than that of the WT rats fed with normal diet (Fig 1I).

169 **Fig 1. AT1aR knockout improved insulin resistance and metabolic disorders in high-fat diet**  
170 **rats.** A: Oral glucose tolerance test (OGTT) curve and area under the curve. B: Insulin tolerance test



171 (ITT) curve and area under the curve. C: Fasting blood glucose (FBG). D: Blood pressure. E: Serum  
172 triglyceride (TG) levels. F: Serum total cholesterol (T-CHO). G: Serum free fatty acid. H: Serum  
173 glycerol. I: Serum low-density lipoprotein (LDL). J: Serum high-density lipoprotein (HDL). \* $p < 0.05$   
174 vs WT-ND rats; # $p < 0.05$  vs WT-HFD rats. Data were presented as Mean  $\pm$  S.E.M. n = 6

### 175 **3.2 AT1aR knockout alleviated high-fat diet-induced adipocyte hypertrophy**

176 Body weight of rats were recorded weekly and the results showed that body weight gain of WT  
177 rats were increased by high-fat diet feeding, while body weight gain of high-fat diet AT1aR<sup>-/-</sup> rats were  
178 much lower than that of high-fat diet WT rats (Fig 2A, B). Epididymal adipose tissues were isolated  
179 and their physical morphology were photographed. As showed in Fig 2C, physical morphology of  
180 epididymal adipose tissue in AT1aR<sup>-/-</sup> rats was smaller than that of WT rats. Besides, the epididymal  
181 fat index of high-fat diet AT1aR<sup>-/-</sup> rats was also decreased compared to high-fat diet WT rats (Fig 2D).  
182 Moreover, the histomorphology of adipose were visualized by HE staining and adipocyte area of WT  
183 rats were significantly enlarged by high-fat diet feeding, whereas this alteration were significantly  
184 reversed in high-fat diet AT1aR<sup>-/-</sup> rats (Fig 2E). These results indicated that AT1aR gene knockout  
185 improved adipose histomorphology and inhibited adipocyte hypertrophy.

186 **Fig 2. AT1aR knockout improved epididymal histomorphology induced by high fat diet.** A,  
187 B: Body weight of rats was recorded weekly and body weight gain was calculated by weight increase  
188 in 12 weeks. C: Physical morphology of epididymal fat; D: Epididymal fat index (showed as  
189 epididymal fat weight/body weight). E: Adipocyte morphology was visualized by HE staining and  
190 adipocyte area were calculate by Image J. \* $p < 0.05$  vs WT-ND rats; # $p < 0.05$  vs WT-HFD rats. Data  
191 were presented as Mean  $\pm$  S.E.M. n = 6

### 192 **3.3 AT1aR gene knockout promoted adipose lipolysis**

193 The main function of white adipose tissue is to store energy in the form of triglycerides and the fat  
194 mass is systematically regulated by lipid synthesis and decomposition. In order to know the underlining  
195 mechanism by which AT1aR gene knockout inhibited adipocyte hypertrophy, we detected the  
196 expressions of major enzymes for triglyceride synthesis and lipolysis in the adipose tissue. Fatty acid  
197 synthase (FAS) and acetyl-CoA carboxylase (ACC) are rate-limiting enzymes involved in biosynthesis  
198 of fatty acids, an important step of lipogenesis[18]. Gene expressions of FAS and ACC were measured  
199 with QPCR and the results showed that there were no significant differences between WT and AT1aR<sup>-/-</sup>  
200 rats neither fed with normal diet nor with high-fat diet (Fig 3A, B). The hydrolysis of triglycerides is  
201 initiated by adipose triglyceride lipase (ATGL)[19], and hormone sensitive lipase (HSL) is the main  
202 hydrolase for triacylglycerol (TAG) and diacylglycerol (DAG)[20]. As showed in Fig 3C, protein  
203 expression of ATGL and phosphorylation of HSL in AT1aR<sup>-/-</sup> rats were much higher than those of WT  
204 rats both in the normal and high-fat diet rats. Furthermore, the adipose tissue was cultured in the  
205 DMEM for 24 hours and the levels of NEFAs and glycerol in the culture medium were detected.  
206 Compared with WT rats fed with high-fat diet, the levels of NEFAs and glycerol released from adipose  
207 tissue of high-fat diet AT1aR<sup>-/-</sup> rats increased significantly (Fig 3D, E). These results proved that  
208 AT1aR knockout improved adipose histomorphology in high-fat diet rats by promoting adipose  
209 lipolysis, while did not affect lipid synthesis.

210 **Fig 3. AT1aR knockout promoted adipose lipolysis.** A, B: Gene expressions of key enzymes for  
211 lipid synthesis in adipose tissue, FAS (A) and ACC (B). C: Protein expressions of adipose lipolysis  
212 related enzymes, ATGL and HSL. D, E: Levels of NEFAs (D) and glycerol (E) in culture medium  
213 released by adipose tissue within 24h. \*p < 0.05 vs WT-ND rats; +p < 0.05 vs AT1aR<sup>-/-</sup>-ND rats. Data  
214 were presented as Mean ± S.E.M. n = 6

### 215 3.4 AT1aR knockout accelerated adipose energy expenditure and fatty acids oxidation

216 Subsequently, adipose lipid utilization was detected. Peroxisome proliferator activated receptor  $\delta$   
217 (PPAR $\delta$ ) is a transcription factor that promote oxidative metabolism in adipose[21] and deiodinase 2  
218 (Dio2) could activate thyroid hormone to promote energy expenditure[22]. The results showed that by  
219 comparison of WT rats fed with high-fat diet, the gene expressions of PPAR $\delta$  and Dio2 in adipose  
220 tissue were significantly increased in high-fat diet AT1aR<sup>-/-</sup> rats (Fig 4A, B), indicating increased  
221 energy consumption adipose tissue of AT1aR<sup>-/-</sup> rats. Besides, the levels of fatty acid oxidation in  
222 adipose tissue were also measured. Peroxisome proliferator-activated receptors  $\alpha$  (PPAR $\alpha$ ) acts as a  
223 transcription factor to regulate a series of genes involved in fatty acid oxidation like carnitine  
224 palmitoyltransferase 1 (CPT1) [23, 24]. The results showed that the gene expressions of PPAR $\alpha$  and  
225 CPT1 were significantly increased in AT1aR<sup>-/-</sup> rats compared with WT rats fed with high fat diet.  
226 However, there was not difference between the WT and AT1aR<sup>-/-</sup> rats fed a normal diet (Fig 4C, D).  
227 These results indicated enhanced fatty acid oxidation in high-fat diet AT1aR<sup>-/-</sup> rats.

228 **Fig4. AT1aR knockout accelerated adipose energy expenditure and fatty acids oxidation.** A,  
229 B: Gene expressions of PPAR $\delta$  (A) and Dio2 (B) in adipose tissue. C, D: Gene expressions of PPAR $\alpha$   
230 and CPT1 in adipose tissue. +p < 0.05 vs AT1aR<sup>-/-</sup>ND rats. Data were presented as Mean  $\pm$  S.E.M. n  
231 = 6

### 232 3.5 AT1aR knockout activated cAMP/PKA pathway

233 It has been reported that the binding of Ang II to AT1R activates Gi protein against the effect of  
234 cAMP/PKA pathway[25]. As showed in Fig 5A and 5B, PKA and cAMP levels were significantly  
235 increased in AT1aR<sup>-/-</sup> rats fed with high-fat. Protein kinase A (PKA) that activated by cyclic adenosine  
236 monophosphate (cAMP) mainly phosphorylates HSL to mediate adipose lipolysis [26]. Apart from

237 HSL, GSK-3 $\beta$  is also an important phosphorylation substrate of PKA[27]. The phosphorylation level of  
238 GSK-3 $\beta$  in AT1aR<sup>-/-</sup> rats was higher than WT rats both in the normal and high-fat diet (Fig 5A), further  
239 confirmed the enhancement of PKA activity in AT1aR<sup>-/-</sup> rats. These results suggested that gene  
240 knockout of AT1aR could activate cAMP/PKA pathway.

241 **Fig 5. AT1aR knockout activated cAMP/PKA pathway.** A: Protein expressions of PKA, P-  
242 GSK-3 $\beta$  (ser9) and GSK-3 $\beta$  in adipose tissue. B: cAMP levels in adipose tissue. C: The proposed  
243 pathway for Ang II inhibiting adipose lipolysis. By binding to AT1R, Ang II activates inhibitory Gi  
244 which in turn reduces cAMP production. As a result, PKA activation is limited and HSL  
245 phosphorylation is decreased, leading to inhibitory triglyceride hydrolysis. +p < 0.05 vs AT1aR<sup>-/-</sup>ND  
246 rats. Data were presented as Mean  $\pm$  S.E.M. n = 6

#### 247 4. Discussion

248 Obesity is the common pathological basis of many metabolic diseases and its mechanism  
249 exploration has attracted more and more attention. RAS is generally considered acting in the regulation  
250 of blood pressure and organism water-salt balance. However, clinical studies have demonstrated that  
251 type 2 diabetes can be delayed by treatment with ACEI and ARB compared with other antihypertensive  
252 drugs[28]. Besides, captopril, one of ACEI drugs, was showed to not only lower blood pressure but  
253 also reduce the weight of high-fat diet rats[29]. These studies indicated that RAS plays an important  
254 role in obesity and subsequent metabolic diseases, whereas the regulatory mechanism remains unclear.  
255 In the present study, we found that the gene knockout of AT1aR improved high-fat diet induced obesity  
256 by promoting lipolysis through cAMP/PKA pathway, providing new sight for the prevention and  
257 treatment of obesity and related metabolic disorders.

258 As the primary peptide of the RAS, Ang II exerts its biological activity mainly through AT1R in

259 adipose tissue. Different from human beings, AT1R is coded by two gene subtypes, AT1aR and  
260 AT1bR, in rodent mammals[30]. AT1aR has the most homology with human, mainly involved in the  
261 vasoconstriction and blood pressure regulation. While AT1bR is related to the thirst response of  
262 mammals and existed in certain areas of the central nervous system and adrenal tissues [31]. So, in the  
263 present study, we constructed AT1aR<sup>-/-</sup> rats to explore the relation between RAS and obesity.

264 Obesity is closely correlated with insulin resistance and diabetes. Besides storage energy, adipose  
265 tissue also acts as an endocrine organ. In obesity, adipocytes secrete inflammatory adipokines which  
266 damage insulin signaling pathway, resulting in disorders of glucose and lipid metabolism<sup>[32]</sup>. Here, we  
267 showed that AT1aR gene knockout improved glucose intolerance and insulin sensibility in high-fat diet  
268 induced obese rats. Consistent with our results, Kengo Azushima et al. has demonstrated that  
269 upregulation of AT1R-related protein (ATRAP), a protein limiting AT1R's effects by promoting its  
270 internalization, could improve insulin resistance[17].

271 Lipid stocks in the adipose tissue fluctuate by lipid synthesis and lipolysis. Our results showed  
272 that AT1aR gene knockout improved adipocyte hypertrophy in obese rats mainly by promoting  
273 lipolysis. However, enhanced lipolysis increases circulatory NEFAs which leading to ectopic  
274 deposition of lipids. Interestingly, serum levels of NEFAs were decreased in high-fat diet AT1aR<sup>-/-</sup> rats  
275 despite significant enhancement of lipolysis in adipose tissue. In this regard, energy expenditure and  
276 NEFAs oxidation in adipose tissue were measured. The results demonstrated that genes expressions of  
277 proteins involved in adipose tissue oxidative metabolism were elevated. Given that increasing lipolysis  
278 in adipose tissue result in elevated circulating NEFAs, our results showed that AT1aR gene knockout  
279 promoted adipose energy expenditure and fatty acids utilization, and thus lowering lipolysis-derived  
280 circulating NEFAs levels.

281 By binding to AT1R, a G protein-coupled receptor, Ang II activates inhibitory Gi protein which  
282 in turn decreases cAMP production[33, 34]. The cAMP/PKA pathway plays an important role in  
283 energy balance and metabolic regulation. As an important second messenger, increased cellular cAMP  
284 activates PKA which in turn phosphorylates HSL[35]. AT1aR gene knockout increased PKA protein  
285 expression and cellular levels of cAMP in the adipose tissue. Activated PKA can be confirmed by  
286 increased phosphorylation of GSK-3 $\beta$ , a main phosphorylation substrate of PKA[27].

287 In conclusion, our results showed that RAS predominant peptide Ang II promoted adipocyte  
288 hypertrophy by inhibition of cAMP/PKA and subsequent adipose lipolysis via binding to AT1aR.  
289 However, AT1aR gene knockout activated cAMP/PKA signaling and elevated adipose lipolysis by  
290 phosphorylation of HSL, and thus improving obesity and insulin resistance (Fig 5C). Our findings  
291 emphasized the special role of RAS signaling in adipose tissue in the progress of obesity and associated  
292 metabolic abnormalities, and provided potential drug target for their therapy.

293

#### 294 **Acknowledgments**

295 Thanks for the support of Shanxi Key Subjects Construction (FSKSC), and Shanxi ‘1331 Project’  
296 Key Subjects Construction.

#### 297 **Author contributions**

298 **Aiyun Li:** Conceptualization, Methodology, Writing - Review & Editing. **Wenjuan Shi:**  
299 Conceptualization, Methodology, Investigation, Writing - Original Draft. **Jin Wang:** Resources,  
300 Project administration, Validation. **Xuejiao Wang:** Investigation, Software. **Yan Zhang:** Validation,  
301 Software. **Zhandong Lei:** Data Curation, Software. **Xiangying Jiao:** Conceptualization, Writing -  
302 Review & Editing, Supervision.

303

304 **References**

- 305 1. Kelly T, Yang W, Chen CS, Reynolds K, He J. Global burden of obesity in 2005 and projections to  
306 2030. *Int J Obes (Lond)*. 2008;32(9):1431-7. Epub 2008/07/09. doi: 10.1038/ijo.2008.102. PubMed  
307 PMID: 18607383.
- 308 2. Ahmadian M, Duncan RE, Jaworski K, Sarkadi-Nagy E, Sul HS. Triacylglycerol metabolism in  
309 adipose tissue. *Future Lipidol*. 2007;2(2):229-37. Epub 2007/04/01. doi: 10.2217/17460875.2.2.229.  
310 PubMed PMID: 19194515; PubMed Central PMCID: PMCPMC2633634.
- 311 3. Sun K, Kusminski CM, Scherer PE. Adipose tissue remodeling and obesity. *J Clin Invest*.  
312 2011;121(6):2094-101. Epub 2011/06/03. doi: 10.1172/JCI45887. PubMed PMID: 21633177; PubMed  
313 Central PMCID: PMCPMC3104761.
- 314 4. Choe SS, Huh JY, Hwang IJ, Kim JI, Kim JB. Adipose Tissue Remodeling: Its Role in Energy  
315 Metabolism and Metabolic Disorders. *Front Endocrinol (Lausanne)*. 2016;7:30. Epub 2016/05/06. doi:  
316 10.3389/fendo.2016.00030. PubMed PMID: 27148161; PubMed Central PMCID: PMCPMC4829583.
- 317 5. Henriksen EJ, Jacob S, Kinnick TR, Teachey MK, Krekler M. Selective angiotensin II receptor  
318 antagonism reduces insulin resistance in obese Zucker rats. *Hypertension*. 2001;38(4):884-90. Epub  
319 2001/10/20. doi: 10.1161/hy1101.092970. PubMed PMID: 11641303.
- 320 6. Shiuchi T, Iwai M, Li HS, Wu L, Min LJ, Li JM, et al. Angiotensin II type-1 receptor blocker  
321 valsartan enhances insulin sensitivity in skeletal muscles of diabetic mice. *Hypertension*.  
322 2004;43(5):1003-10. Epub 2004/03/24. doi: 10.1161/01.HYP.0000125142.41703.64. PubMed PMID:  
323 15037562.
- 324 7. Takahashi N, Li F, Hua K, Deng J, Wang CH, Bowers RR, et al. Increased energy expenditure,

- 325 dietary fat wasting, and resistance to diet-induced obesity in mice lacking renin. *Cell Metab.*  
326 2007;6(6):506-12. Epub 2007/12/07. doi: 10.1016/j.cmet.2007.10.011. PubMed PMID: 18054319;  
327 PubMed Central PMCID: PMCPMC2174204.
- 328 8. Rahmouni K, Mark AL, Haynes WG, Sigmund CD. Adipose depot-specific modulation of  
329 angiotensinogen gene expression in diet-induced obesity. *Am J Physiol Endocrinol Metab.*  
330 2004;286(6):E891-5. Epub 2004/01/30. doi: 10.1152/ajpendo.00551.2003. PubMed PMID: 14749209.
- 331 9. Prasad A, Quyyumi AA. Renin-angiotensin system and angiotensin receptor blockers in the  
332 metabolic syndrome. *Circulation.* 2004;110(11):1507-12. Epub 2004/09/15. doi:  
333 10.1161/01.CIR.0000141736.76561.78. PubMed PMID: 15364819.
- 334 10. Engeli S, Schling P, Gorzelniak K, Boschmann M, Janke J, Ailhaud G, et al. The adipose-tissue  
335 renin-angiotensin-aldosterone system: role in the metabolic syndrome? *The International Journal of*  
336 *Biochemistry & Cell Biology.* 2003;35(6):807-25. doi: 10.1016/s1357-2725(02)00311-4.
- 337 11. Kalupahana NS, Massiera F, Quignard-Boulangé A, Ailhaud G, Voy BH, Wasserman DH, et al.  
338 Overproduction of angiotensinogen from adipose tissue induces adipose inflammation, glucose  
339 intolerance, and insulin resistance. *Obesity (Silver Spring).* 2012;20(1):48-56. Epub 2011/10/08. doi:  
340 10.1038/oby.2011.299. PubMed PMID: 21979391; PubMed Central PMCID: PMCPMC4465436.
- 341 12. Jones BH, Standridge MK, Taylor JW, Moustaid N. Angiotensinogen gene expression in adipose  
342 tissue: analysis of obese models and hormonal and nutritional control. *Am J Physiol.* 1997;273(1 Pt  
343 2):R236-42. Epub 1997/07/01. doi: 10.1152/ajpregu.1997.273.1.R236. PubMed PMID: 9249555.
- 344 13. Pahlavani M, Kalupahana NS, Ramalingam L, Moustaid-Moussa N. Regulation and Functions of  
345 the Renin-Angiotensin System in White and Brown Adipose Tissue. *Compr Physiol.* 2017;7(4):1137-50.  
346 Epub 2017/09/16. doi: 10.1002/cphy.c160031. PubMed PMID: 28915321; PubMed Central PMCID:



347 PMCPMC7561006.

348 14. Jing F, Mogi M, Horiuchi M. Role of renin–angiotensin–aldosterone system in adipose tissue  
349 dysfunction. *Molecular and Cellular Endocrinology*. 2013;378(1-2):23-8. doi:  
350 10.1016/j.mce.2012.03.005.

351 15. Wang CH, Li F, Takahashi N. The renin angiotensin system and the metabolic syndrome. *Open*  
352 *Hypertens J*. 2010;3:1-13. Epub 2010/12/07. doi: 10.2174/1876526203010001. PubMed PMID:  
353 21132096; PubMed Central PMCID: PMCPMC2995894.

354 16. de Kloet AD, Pioquinto DJ, Nguyen D, Wang L, Smith JA, Hiller H, et al. Obesity induces  
355 neuroinflammation mediated by altered expression of the renin-angiotensin system in mouse  
356 forebrain nuclei. *Physiol Behav*. 2014;136:31-8. Epub 2014/02/11. doi:  
357 10.1016/j.physbeh.2014.01.016. PubMed PMID: 24508821; PubMed Central PMCID:  
358 PMCPMC4125551.

359 17. Azushima K, Ohki K, Wakui H, Uneda K, Haku S, Kobayashi R, et al. Adipocyte - Specific  
360 Enhancement of Angiotensin II Type 1 Receptor - Associated Protein Ameliorates Diet - Induced  
361 Visceral Obesity and Insulin Resistance. *Journal of the American Heart Association*. 2017;6(3). doi:  
362 10.1161/jaha.116.004488.

363 18. Wakil SJ, Stoops JK, Joshi VC. Fatty acid synthesis and its regulation. *Annu Rev Biochem*.  
364 1983;52:537-79. Epub 1983/01/01. doi: 10.1146/annurev.bi.52.070183.002541. PubMed PMID:  
365 6137188.

366 19. Schreiber R, Xie H, Schweiger M. Of mice and men: The physiological role of adipose triglyceride  
367 lipase (ATGL). *Biochimica et Biophysica Acta (BBA) - Molecular and Cell Biology of Lipids*.  
368 2019;1864(6):880-99. doi: 10.1016/j.bbalip.2018.10.008.

- 369 20. Duncan RE, Ahmadian M, Jaworski K, Sarkadi-Nagy E, Sul HS. Regulation of Lipolysis in  
370 Adipocytes. Annual Review of Nutrition. 2007;27(1):79-101. doi:  
371 10.1146/annurev.nutr.27.061406.093734.
- 372 21. Roberts LD, Murray AJ, Menassa D, Ashmore T, Nicholls AW, Griffin JL. The contrasting roles of  
373 PPARdelta and PPARgamma in regulating the metabolic switch between oxidation and storage of fats  
374 in white adipose tissue. Genome Biol. 2011;12(8):R75. Epub 2011/08/17. doi: 10.1186/gb-2011-12-8-  
375 r75. PubMed PMID: 21843327; PubMed Central PMCID: PMC3245615.
- 376 22. Castillo M, Hall JA, Correa-Medina M, Ueta C, Kang HW, Cohen DE, et al. Disruption of thyroid  
377 hormone activation in type 2 deiodinase knockout mice causes obesity with glucose intolerance and  
378 liver steatosis only at thermoneutrality. Diabetes. 2011;60(4):1082-9. Epub 2011/02/22. doi:  
379 10.2337/db10-0758. PubMed PMID: 21335378; PubMed Central PMCID: PMC3064082.
- 380 23. Sun B, Jia Y, Hong J, Sun Q, Gao S, Hu Y, et al. Sodium Butyrate Ameliorates High-Fat-Diet-  
381 Induced Non-alcoholic Fatty Liver Disease through Peroxisome Proliferator-Activated Receptor alpha-  
382 Mediated Activation of beta Oxidation and Suppression of Inflammation. J Agric Food Chem.  
383 2018;66(29):7633-42. Epub 2018/07/03. doi: 10.1021/acs.jafc.8b01189. PubMed PMID: 29961332.
- 384 24. Yoon S, Kim J, Lee H, Lee H, Lim J, Yang H, et al. The effects of herbal composition  
385 Gambigyeongsinwhan (4) on hepatic steatosis and inflammation in Otsuka Long-Evans Tokushima  
386 fatty rats and HepG2 cells. J Ethnopharmacol. 2017;195:204-13. Epub 2016/11/16. doi:  
387 10.1016/j.jep.2016.11.020. PubMed PMID: 27845265.
- 388 25. Crajoinas RO, Polidoro JZ, Carneiro de Moraes CP, Castelo-Branco RC, Girardi AC. Angiotensin II  
389 counteracts the effects of cAMP/PKA on NHE3 activity and phosphorylation in proximal tubule cells.  
390 Am J Physiol Cell Physiol. 2016;311(5):C768-C76. Epub 2016/11/03. doi: 10.1152/ajpcell.00191.2016.

- 391 PubMed PMID: 27510906.
- 392 26. London E, Bloyd M, Stratakis CA. PKA functions in metabolism and resistance to obesity: lessons  
393 from mouse and human studies. *J Endocrinol.* 2020;246(3):R51-R64. Epub 2020/06/03. doi:  
394 10.1530/JOE-20-0035. PubMed PMID: 32485681; PubMed Central PMCID: PMC7385994.
- 395 27. Fang X, Yu SX, Lu Y, Bast RC, Jr., Woodgett JR, Mills GB. Phosphorylation and inactivation of  
396 glycogen synthase kinase 3 by protein kinase A. *Proc Natl Acad Sci U S A.* 2000;97(22):11960-5. Epub  
397 2000/10/18. doi: 10.1073/pnas.220413597. PubMed PMID: 11035810; PubMed Central PMCID:  
398 PMCPMC17277.
- 399 28. Abuissa H, Jones PG, Marso SP, O'Keefe JH, Jr. Angiotensin-converting enzyme inhibitors or  
400 angiotensin receptor blockers for prevention of type 2 diabetes: a meta-analysis of randomized  
401 clinical trials. *J Am Coll Cardiol.* 2005;46(5):821-6. Epub 2005/09/06. doi: 10.1016/j.jacc.2005.05.051.  
402 PubMed PMID: 16139131.
- 403 29. de Kloet AD, Krause EG, Kim DH, Sakai RR, Seeley RJ, Woods SC. The effect of angiotensin-  
404 converting enzyme inhibition using captopril on energy balance and glucose homeostasis.  
405 *Endocrinology.* 2009;150(9):4114-23. Epub 2009/06/06. doi: 10.1210/en.2009-0065. PubMed PMID:  
406 19497971; PubMed Central PMCID: PMC2736089.
- 407 30. Sasamura H, Hein L, Krieger JE, Pratt RE, Kobilka BK, Dzau VJ. Cloning, characterization, and  
408 expression of two angiotensin receptor (AT-1) isoforms from the mouse genome. *Biochemical and*  
409 *Biophysical Research Communications.* 1992;185(1):253-9. doi: 10.1016/s0006-291x(05)80983-0.
- 410 31. Burson JM, Aguilera G, Gross KW, Sigmund CD. Differential expression of angiotensin receptor  
411 1A and 1B in mouse. *Am J Physiol.* 1994;267(2 Pt 1):E260-7. Epub 1994/08/01. doi:  
412 10.1152/ajpendo.1994.267.2.E260. PubMed PMID: 8074205.

413 32. Bays HE, Gonzalez-Campoy JM, Bray GA, Kitabchi AE, Bergman DA, Schorr AB, et al. Pathogenic  
414 potential of adipose tissue and metabolic consequences of adipocyte hypertrophy and increased  
415 visceral adiposity. *Expert Rev Cardiovasc Ther.* 2008;6(3):343-68. Epub 2008/03/11. doi:  
416 10.1586/14779072.6.3.343. PubMed PMID: 18327995.

417 33. Liu FY, Cogan MG. Angiotensin II stimulates early proximal bicarbonate absorption in the rat by  
418 decreasing cyclic adenosine monophosphate. *J Clin Invest.* 1989;84(1):83-91. Epub 1989/07/01. doi:  
419 10.1172/JCI114174. PubMed PMID: 2544631; PubMed Central PMCID: PMCPMC303956.

420 34. Anand-Srivastava MB. Modulation of Gi Proteins in Hypertension: Role of Angiotensin II and  
421 Oxidative Stress. *Curr Cardiol Rev.* 2010;6(4):298-308. Epub 2011/11/02. doi:  
422 10.2174/157340310793566046. PubMed PMID: 22043206; PubMed Central PMCID:  
423 PMCPMC3083811.

424 35. Schweiger M, Schreiber R, Haemmerle G, Lass A, Fledelius C, Jacobsen P, et al. Adipose  
425 triglyceride lipase and hormone-sensitive lipase are the major enzymes in adipose tissue  
426 triacylglycerol catabolism. *J Biol Chem.* 2006;281(52):40236-41. Epub 2006/11/01. doi:  
427 10.1074/jbc.M608048200. PubMed PMID: 17074755.

428

429

#### 430 **Supporting information**

431 **S1 Fig.** PCR results for AT1aR<sup>-/-</sup> rats and WT rats. M: marker; N: negative control; P: positive control

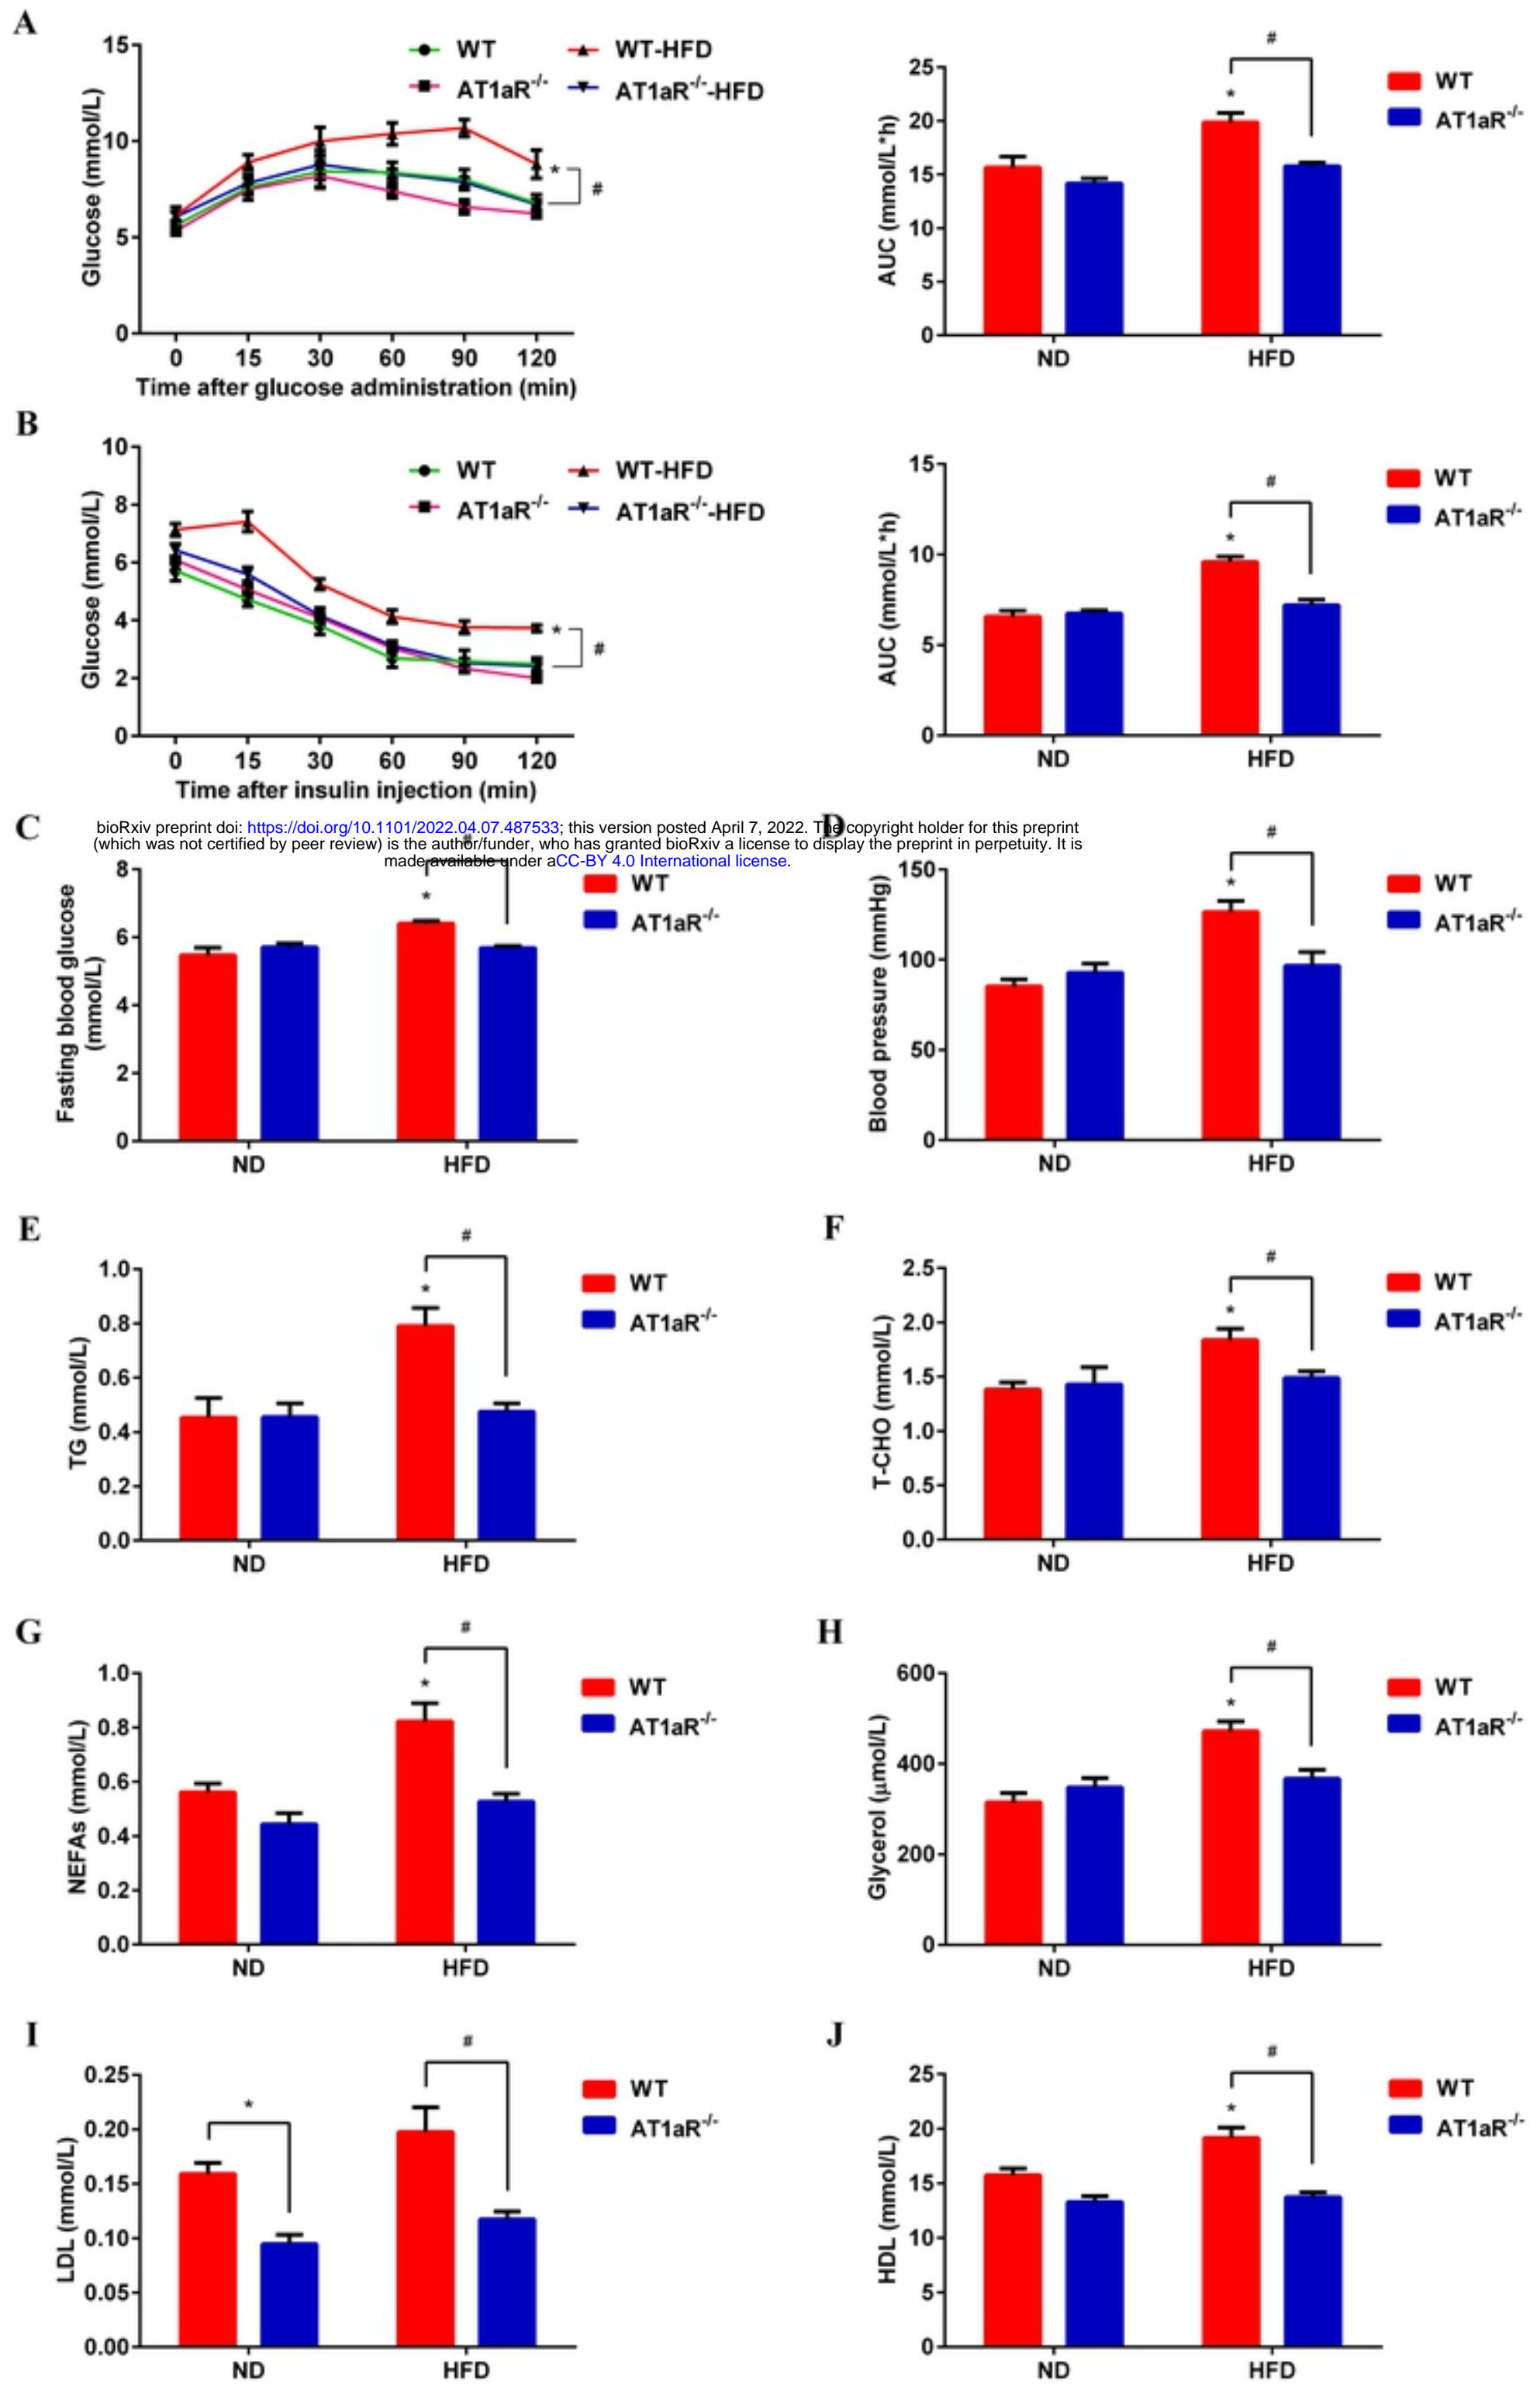

Figure

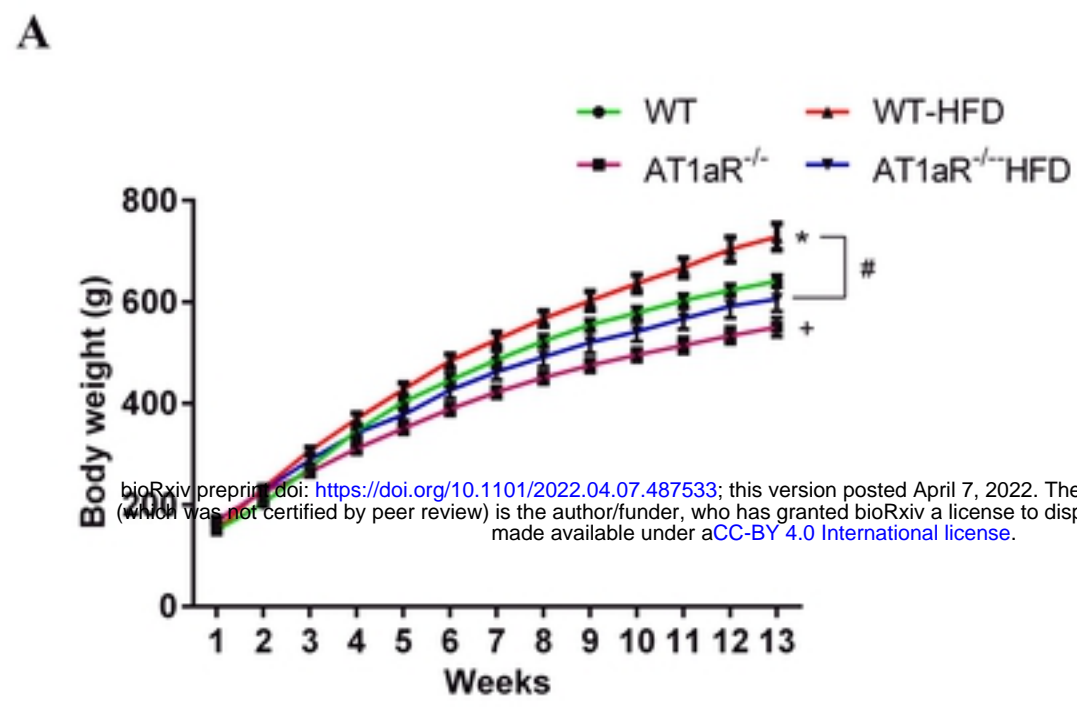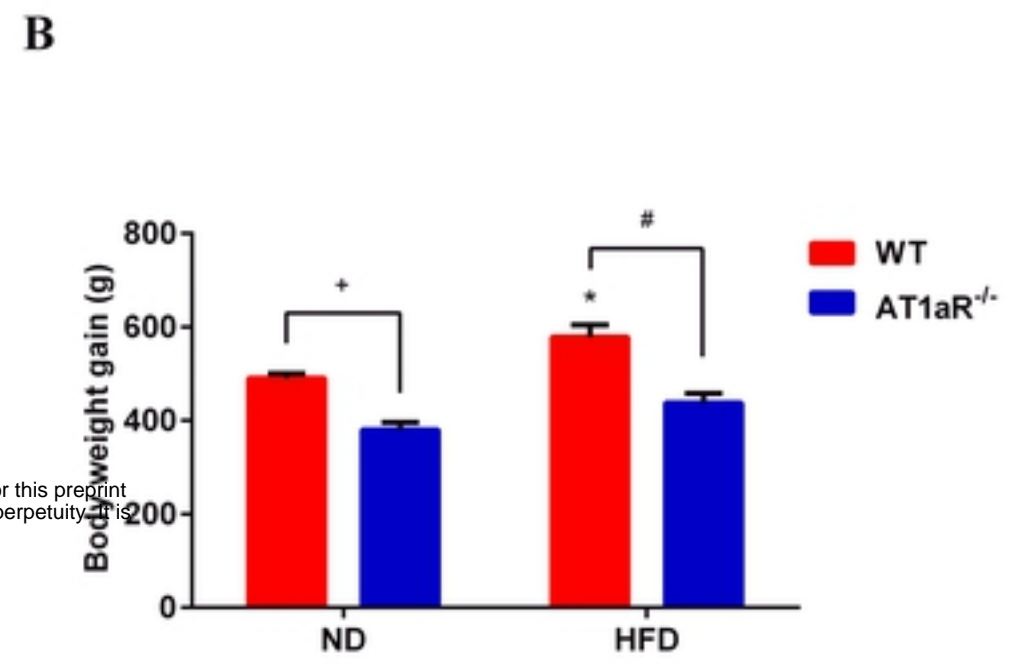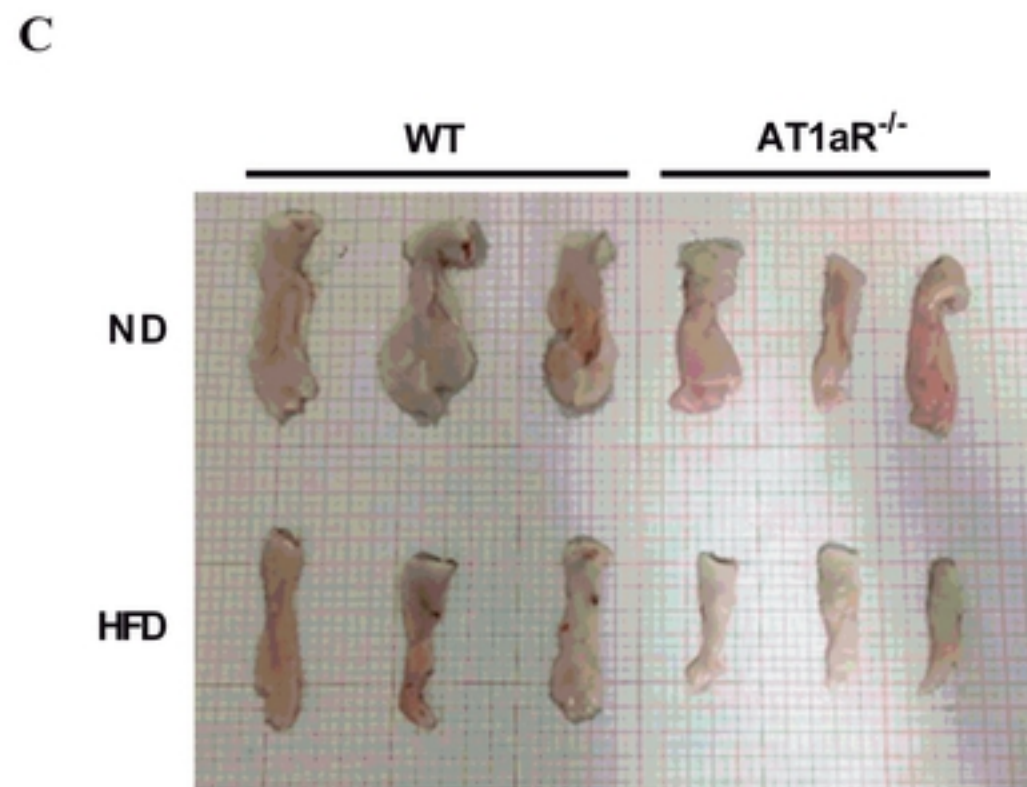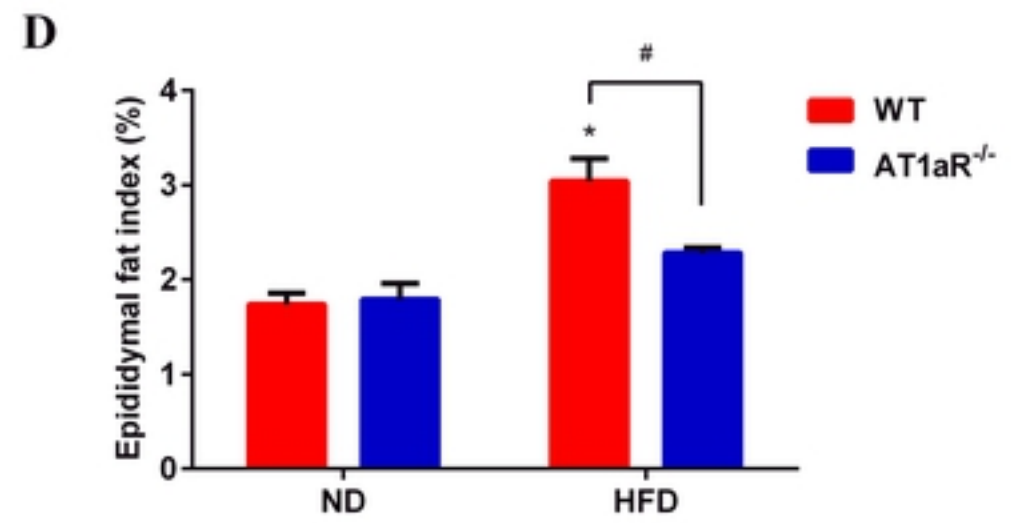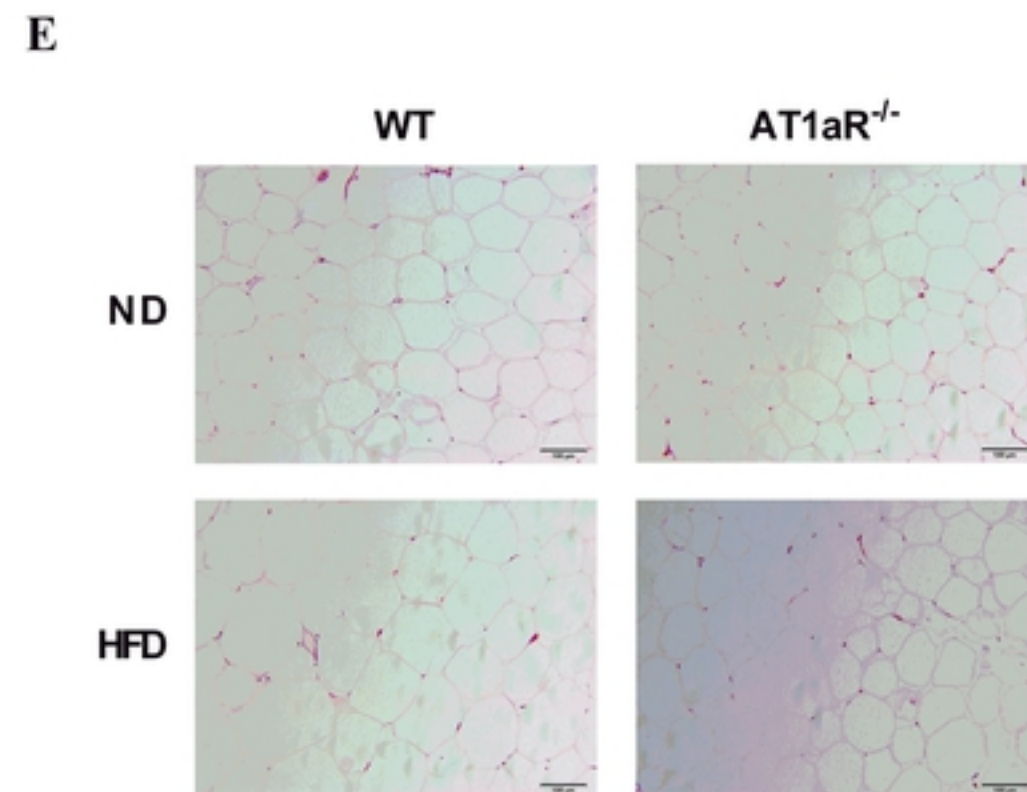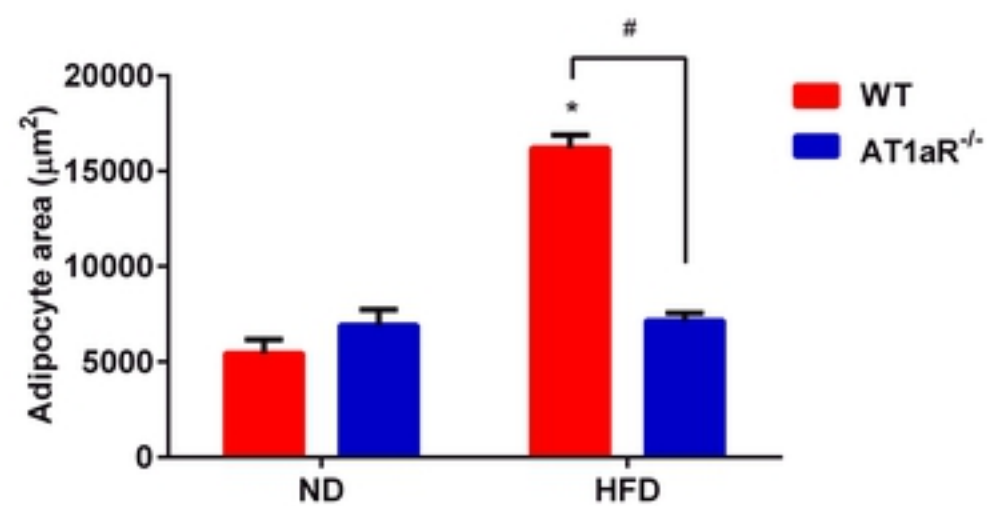

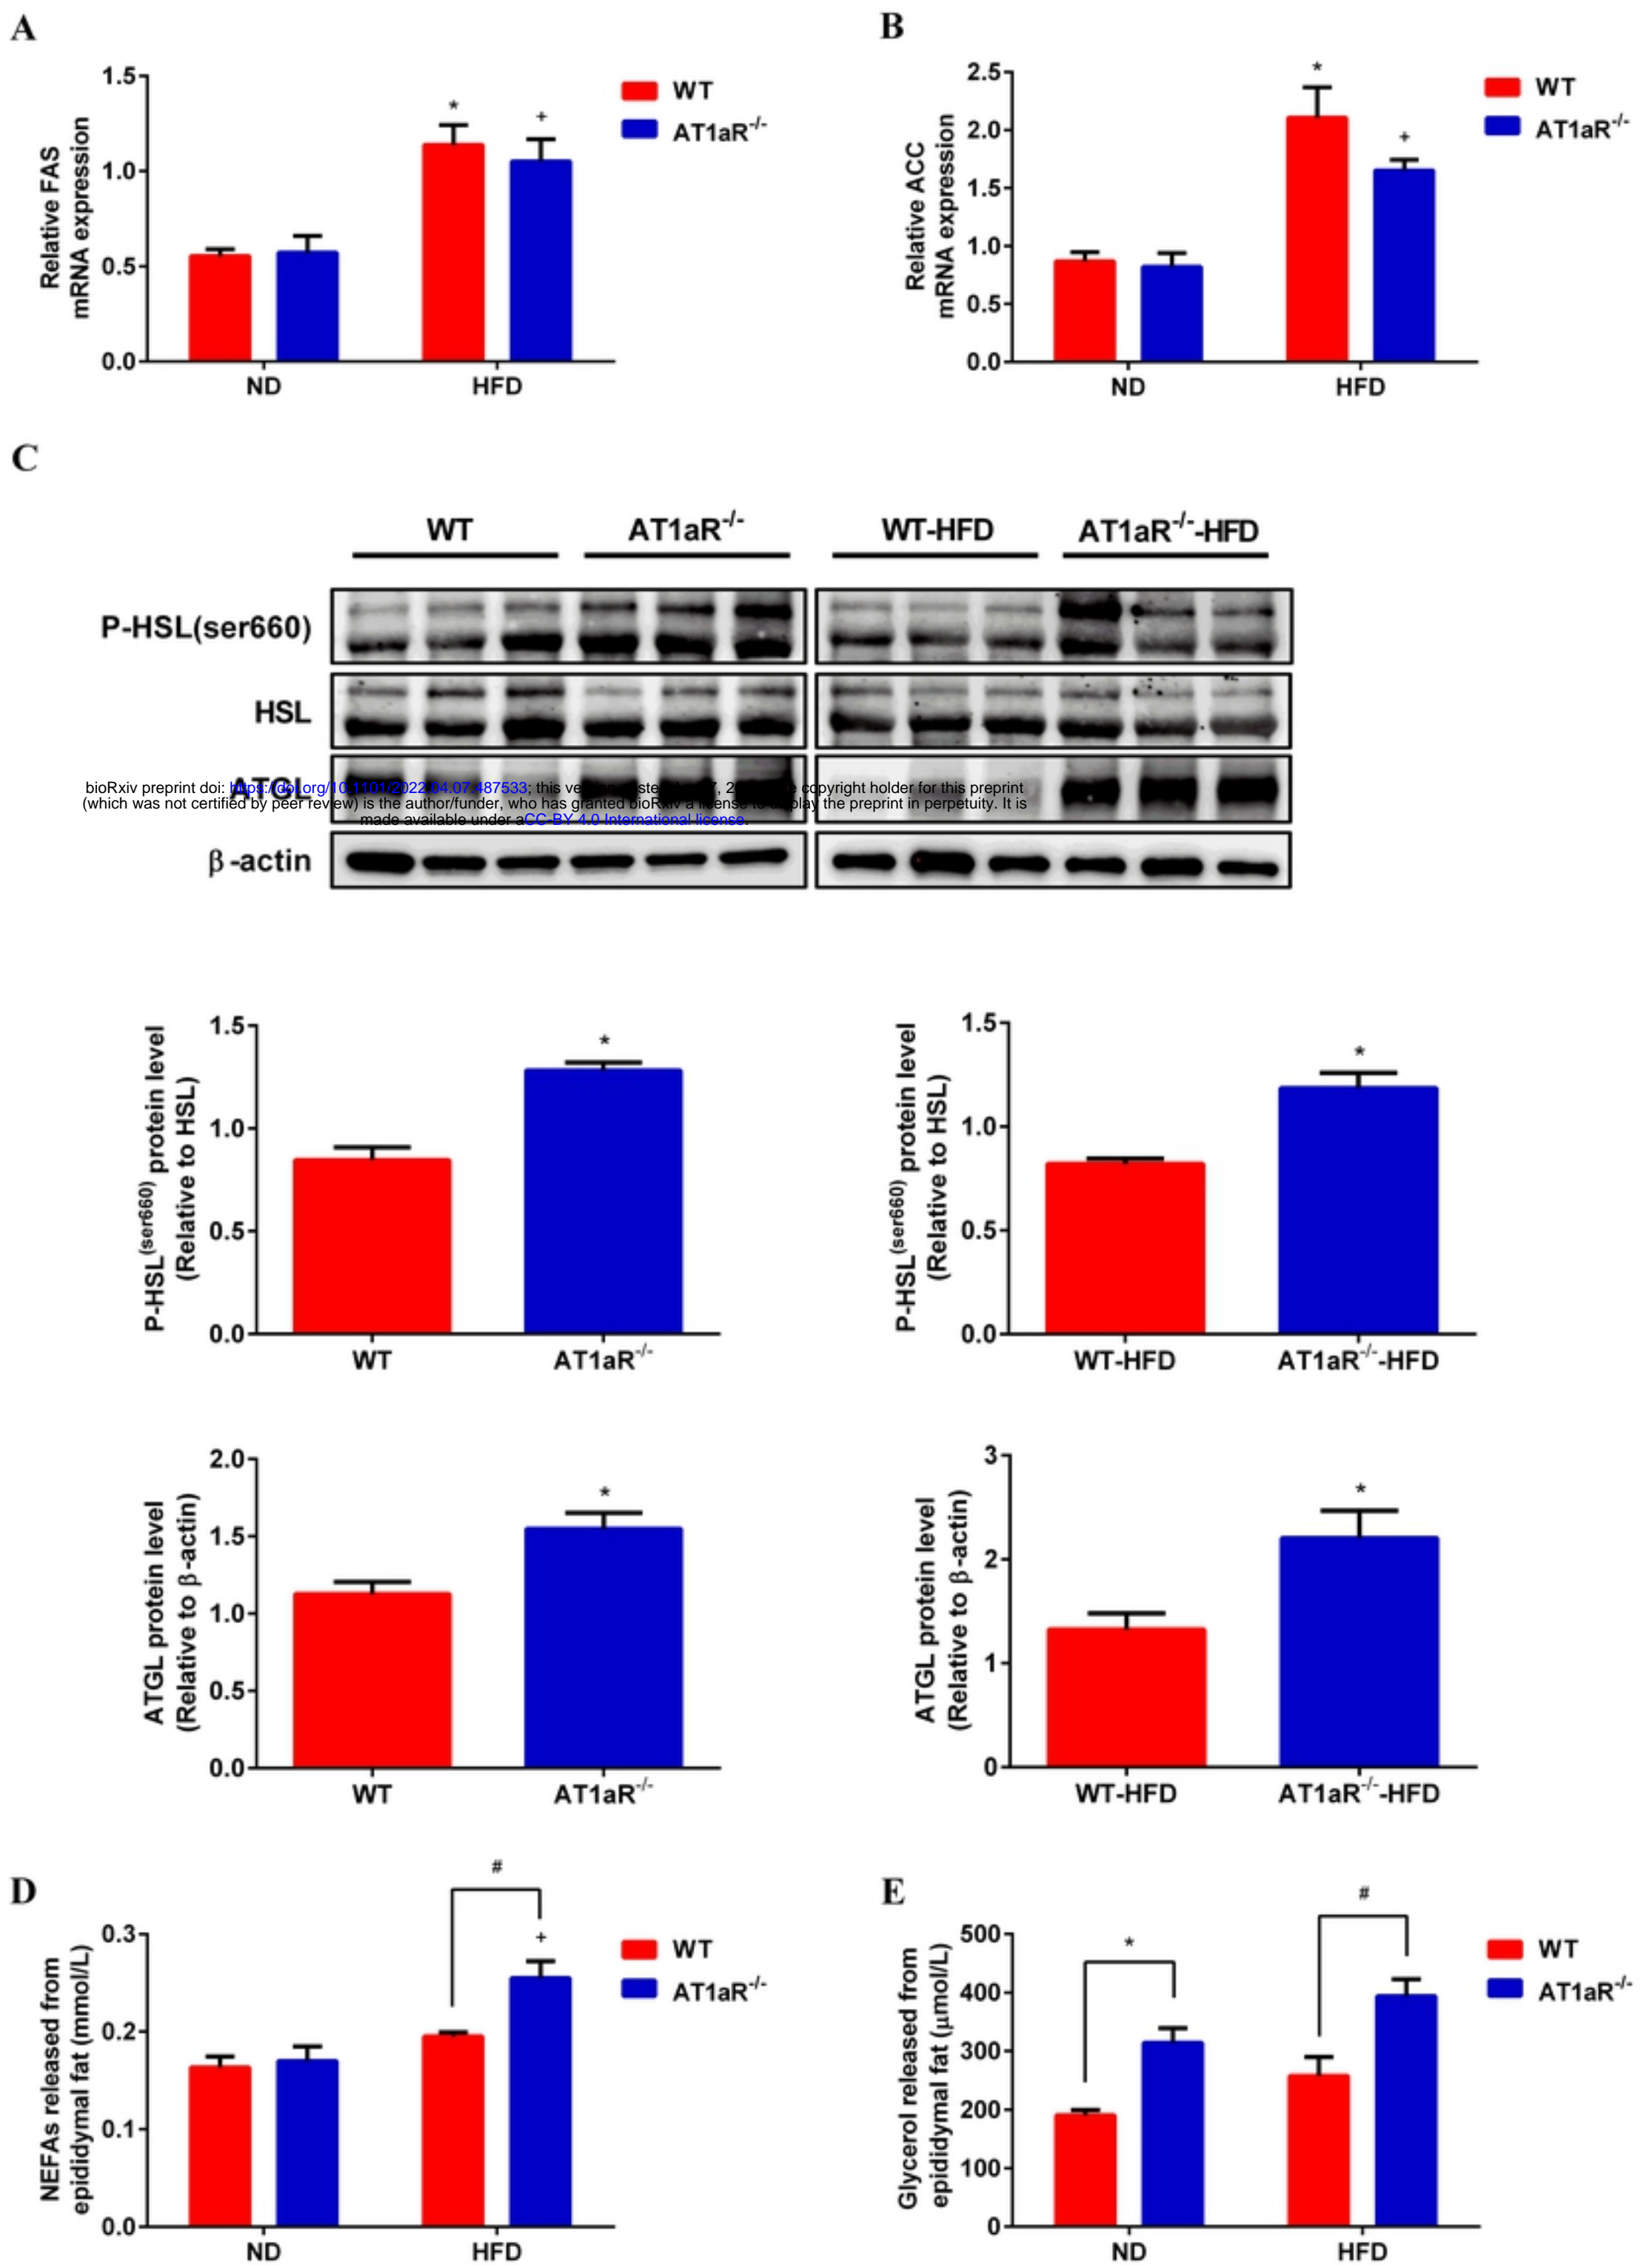

Figure

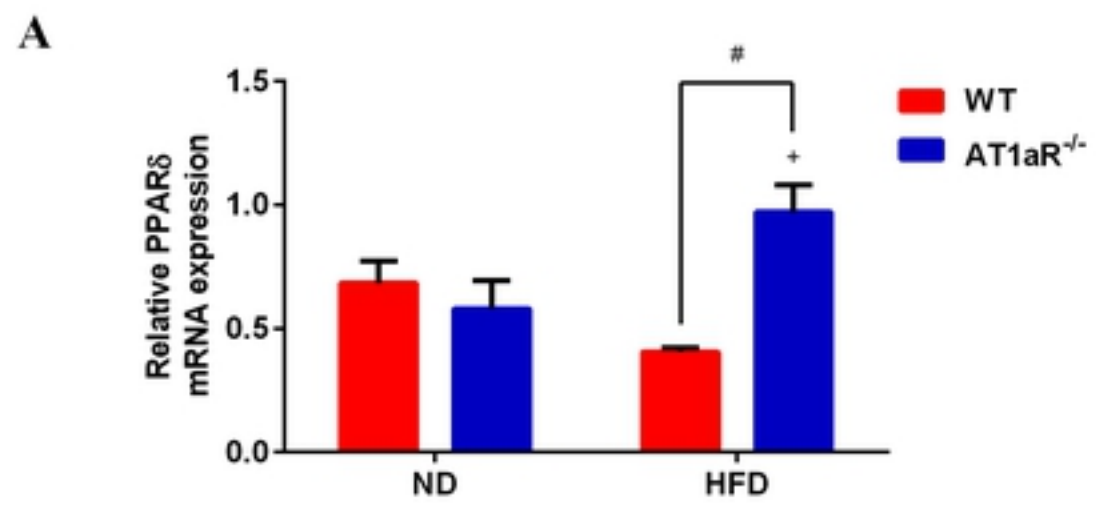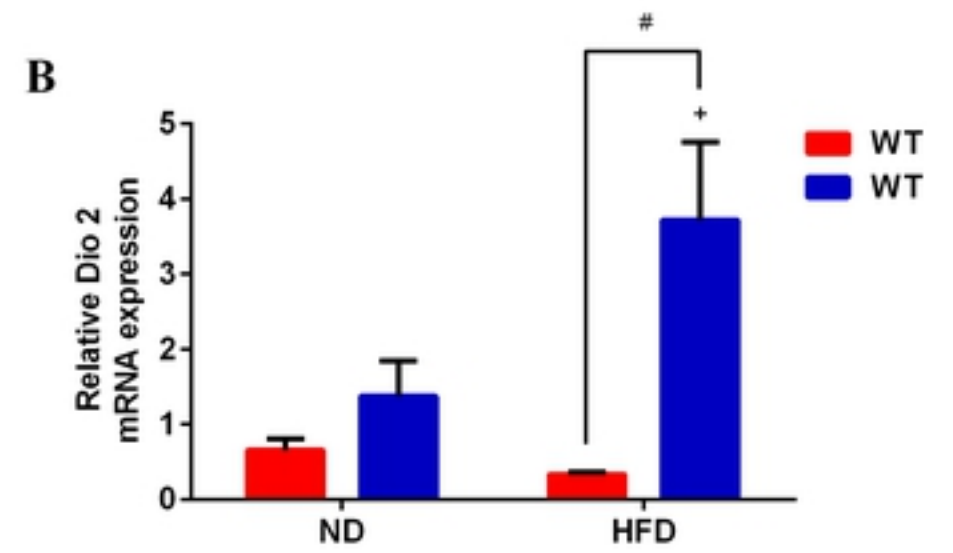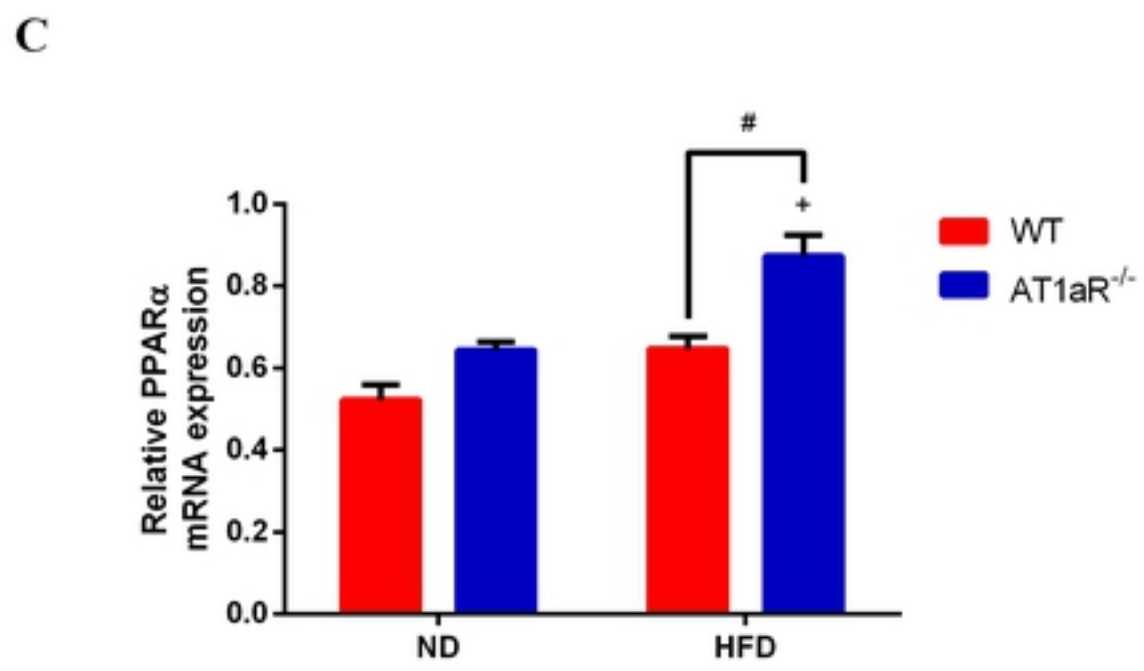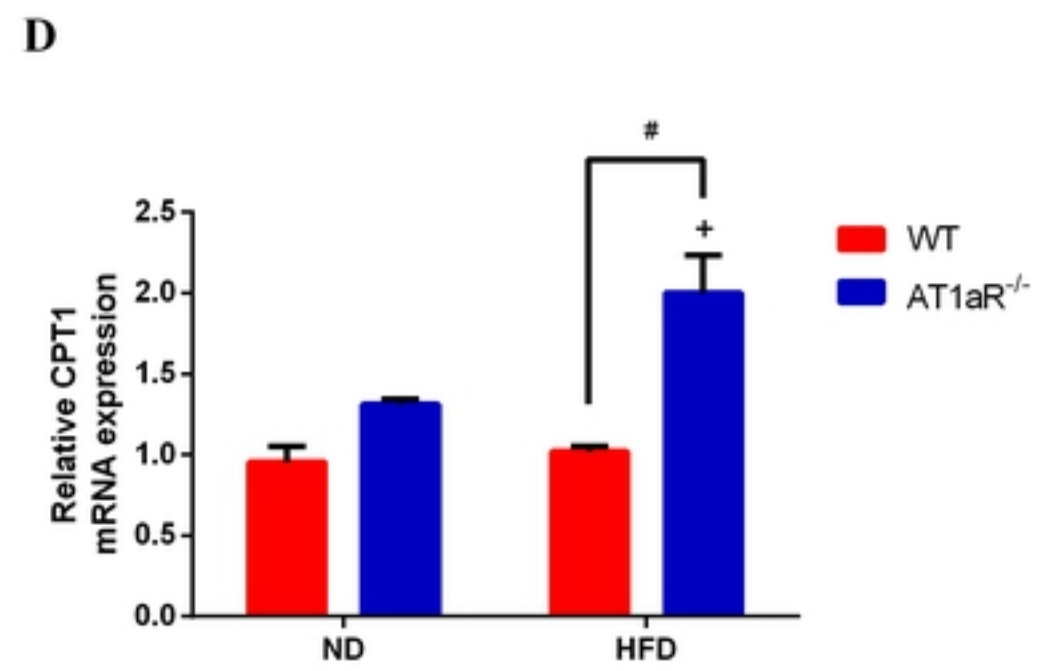

Figure



A

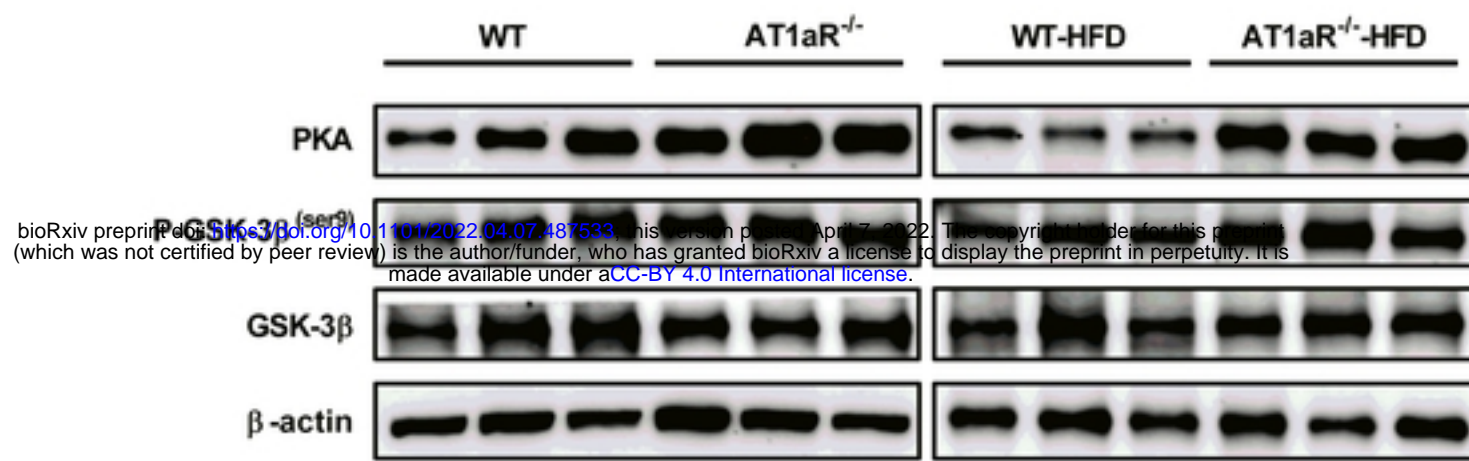

bioRxiv preprint doi: <https://doi.org/10.1101/2022.04.07.487533>; this version posted April 7, 2022. The copyright holder for this preprint (which was not certified by peer review) is the author/funder, who has granted bioRxiv a license to display the preprint in perpetuity. It is made available under aCC-BY 4.0 International license.

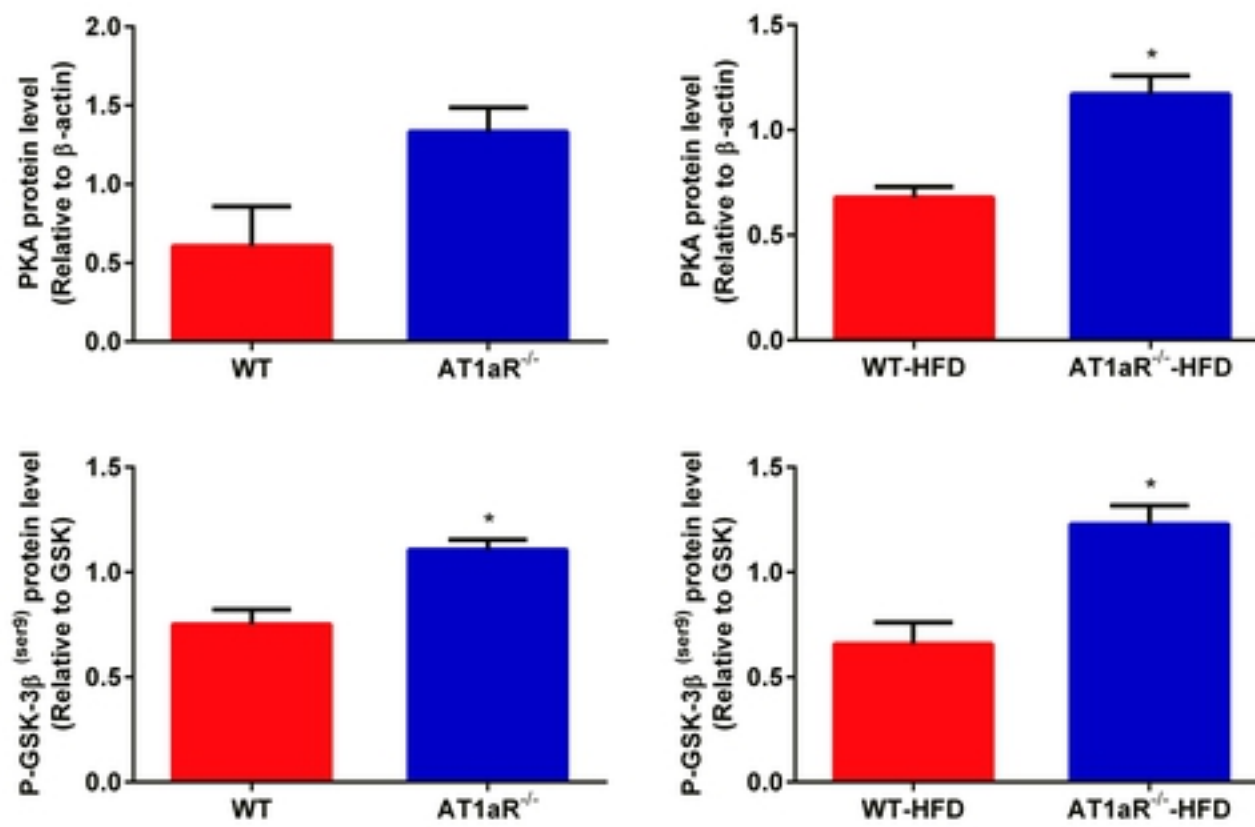

B

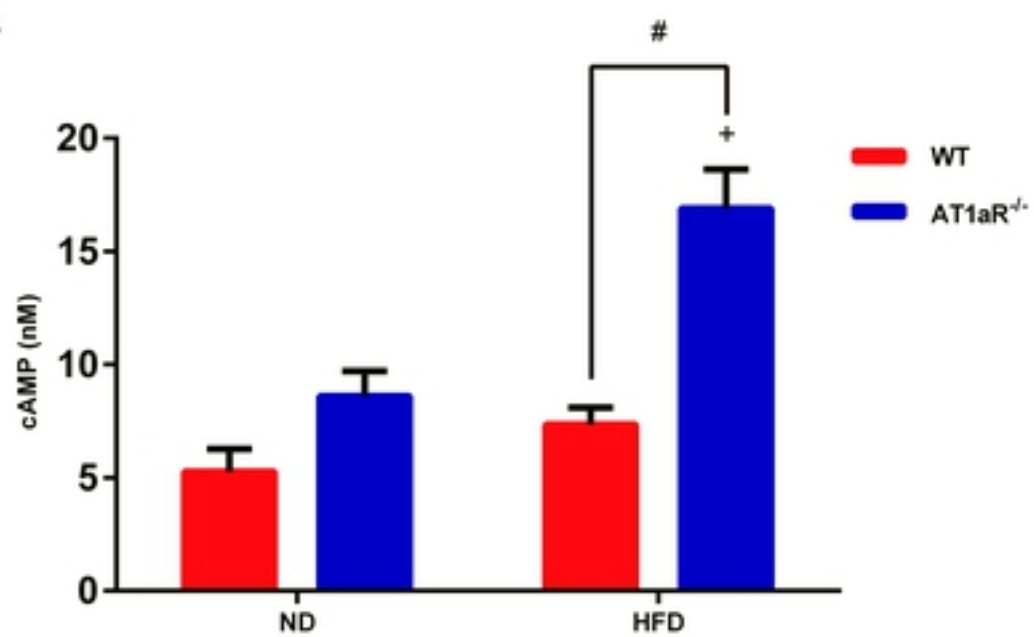

C

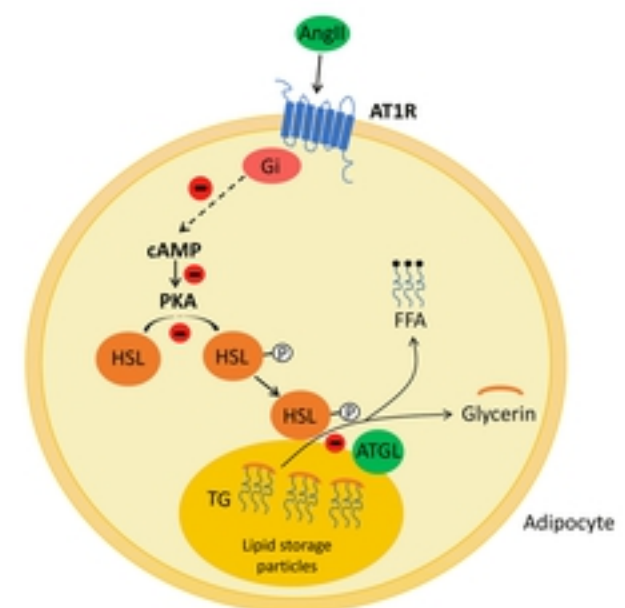

A

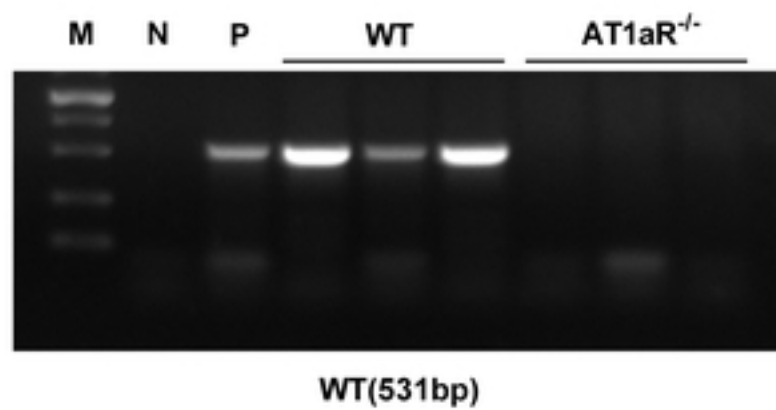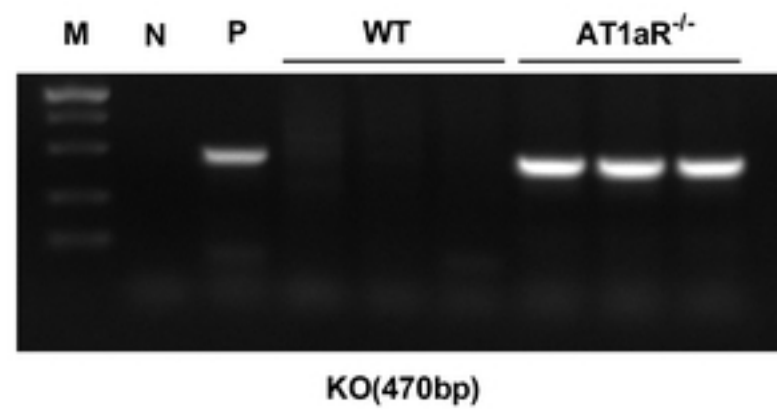

Figure
